# Supplementary material for: In Vivo, In Vitro and In Silico Studies of the Hybrid Compound AA3266, an Opioid Agonist/NK1R Antagonist with Selective Cytotoxicity
Source: PubMed Central journal article supplement (PMC7588979; doi:10.3390/ijms21207738), 2020-10-19
Supplement: ijms-21-07738-s001.pdf [file ijms-21-07738-s001.pdf]

Supplementary Materials to:

# In vivo, in vitro and in silico studies on AA3266, an opioid peptide with selective cytotoxicity

By:

**Joanna Matalińska**<sup>1,\*</sup>, **Piotr F.J. Lipiński**<sup>1</sup>, **Piotr Kosson**<sup>2</sup>, **Katarzyna Kosińska**<sup>1</sup>, and **Aleksandra Misicka**<sup>1,3,\*</sup>

<sup>1</sup> Department of Neuropeptides, Mossakowski Medical Research Centre Polish Academy of Sciences, Pawińskiego 5, 02-106 Warsaw, Poland; [jmatalinska@imdik.pan.pl](mailto:jmatalinska@imdik.pan.pl) (J.M.); [plipinski@imdik.pan.pl](mailto:plipinski@imdik.pan.pl) (P.F.J.L.); [kkosinska@imdik.pan.pl](mailto:kkosinska@imdik.pan.pl) (K.K.); [misicka@chem.uw.edu.pl](mailto:misicka@chem.uw.edu.pl) (A.M.)

<sup>2</sup> Toxicology Research Laboratory, Mossakowski Medical Research Centre Polish Academy of Sciences, Pawińskiego 5, 02-106 Warsaw, Poland; [pkosson@imdik.pan.pl](mailto:pkosson@imdik.pan.pl)

<sup>3</sup> Faculty of Chemistry, University of Warsaw, Pasteura 1, 02-093 Warsaw, Poland; [misicka@chem.uw.edu.pl](mailto:misicka@chem.uw.edu.pl)

\* Correspondence: [jmatalinska@imdik.pan.pl](mailto:jmatalinska@imdik.pan.pl) (J.M.); [misicka@chem.uw.edu.pl](mailto:misicka@chem.uw.edu.pl) (A.M.).

## Table of contents:

**Figure S1.** RMSD plot of the protein in the simulations of AA3266/MOR complex.

**Figure S2.** RMSD plot of the Tyr-D-Ala-Gly-Phe- fragment in the simulations of AA3266/MOR complex.

**Figure S3.** RMSD plot of the -NH-NH<-Z-D-Trp fragment in the simulations of AA3266/MOR complex.

**Figure S4.** Superposition of MOR-1 binding pose and experimental position of DAMGO in 6DDF PDB structure.

**Figure S5.** Distance between Tyr<sup>1</sup> amine nitrogen in AA3266 and Asp147 (CG) in MD simulations of AA3266/MOR complex.

**Figure S6.** Distance between Tyr<sup>1</sup> phenol oxygen in AA3266 and His297 (NE) in MD simulations of AA3266/MOR complex.

**Figure S7.** Conformation of AA3266 in MOR-b binding pose.

**Figure S8.** RMSD plot of the protein in the simulations of AA3266/NK1R complex.

**Figure S9.** RMSD plot of the -NH-NH<-Z-D-Trp fragment in the simulations of AA3266/NK1R complex.

**Figure S10.** RMSD plot of the Tyr-D-Ala-Gly-Phe- fragment in the simulations of AA3266/NK1R complex.

**Figure S11.** Distance between carbamate oxygen in AA3266 and Gln165 (NE) in MD simulations of AA3266/NK1R complex.

**Figure S12.** Distance between acyl oxygen (of the opioid side) of the *N'*-acylhydrazide in AA3266 and Asn109 (ND) in MD simulations of AA3266/NK1R complex.

**Figure S13.** Distance between hydrogen (of the D-Trp side) of the *N'*-acylhydrazide in AA3266 and Asn109 (OD) in MD simulations of AA3266/NK1R complex.

**Figure S14.** Distance between Tyr<sup>1</sup> amine in AA3266 and Glu193 (CD) in MD simulations of AA3266/NK1R complex.

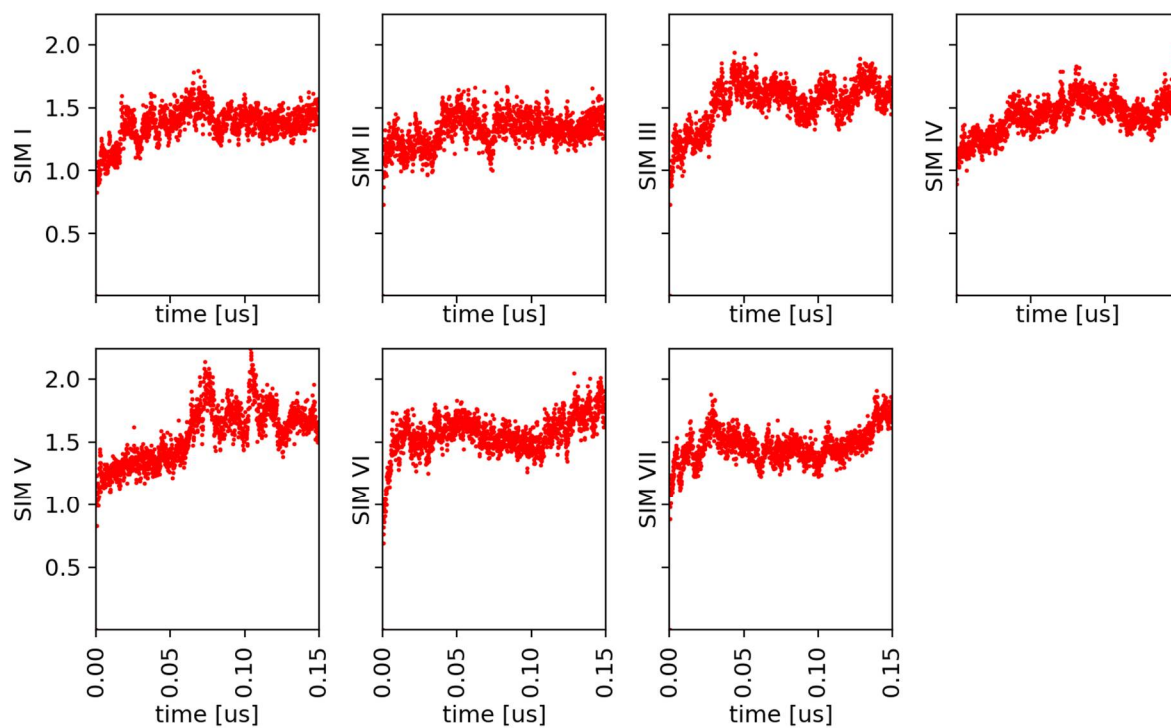

**Figure S1.** RMSD plot of the protein in the simulations of AA3266/MOR complexes.

*RMSD is given in Angstroms.*

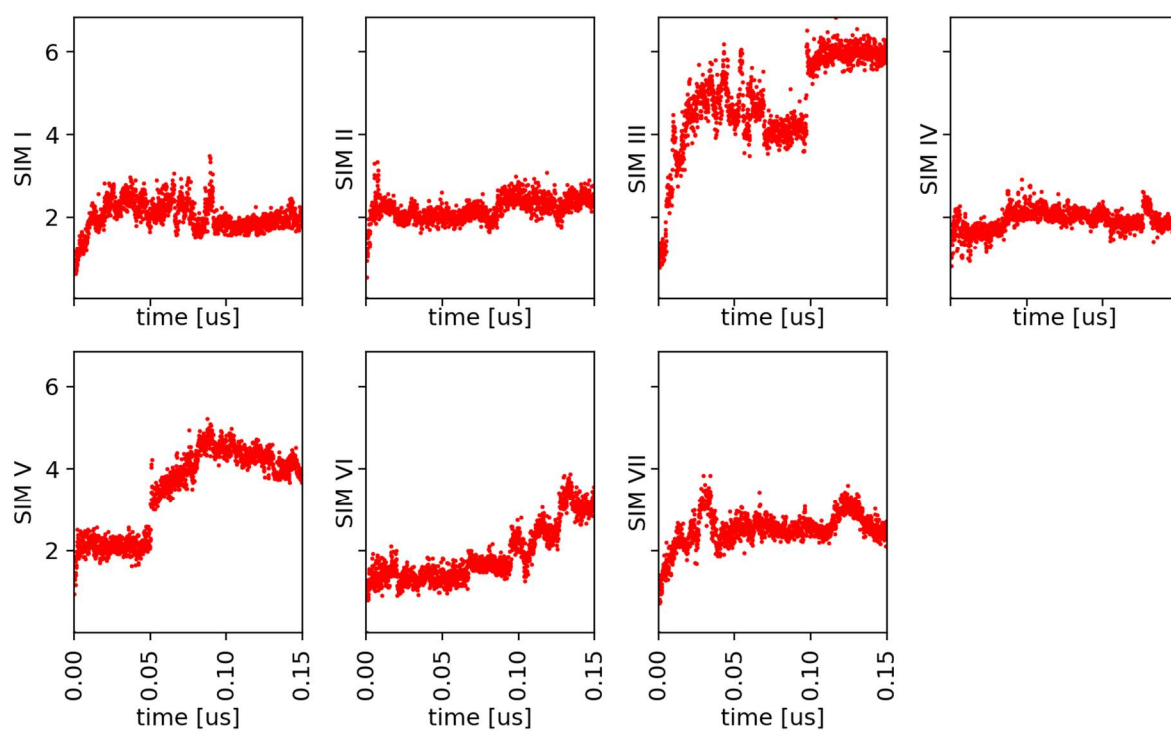

**Figure S2.** RMSD plot of the Tyr-D-Ala-Gly-Phe- fragment in the simulations of AA3266/MOR complexes.

*RMSD is given in Angstroms.*

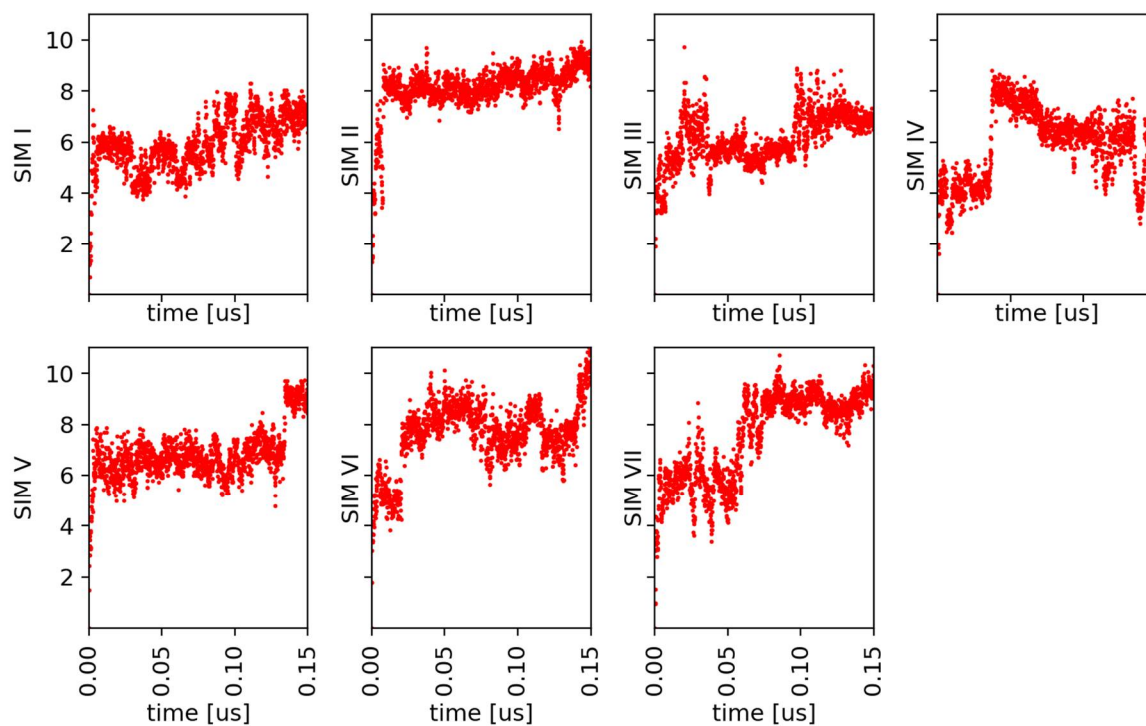

**Figure S3.** RMSD plot of the -NH-NH<-Z-D-Trp fragment in the simulations of AA3266/MOR complexes.

*RMSD is given in Angstroms.*

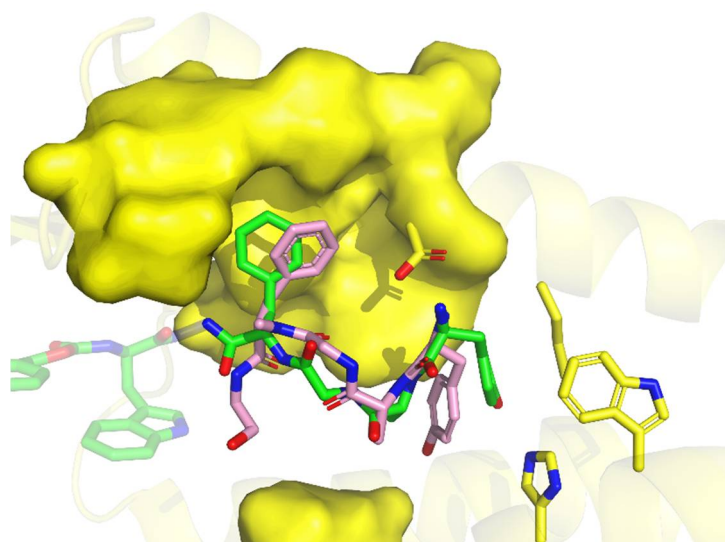

**Figure S4.** Superposition of MOR-1 binding pose and experimental position of DAMGO in 6DDF PDB structure.

*AA3266 is in green, DAMGO in pink. The receptor is shown in a simplified manner (yellow).*

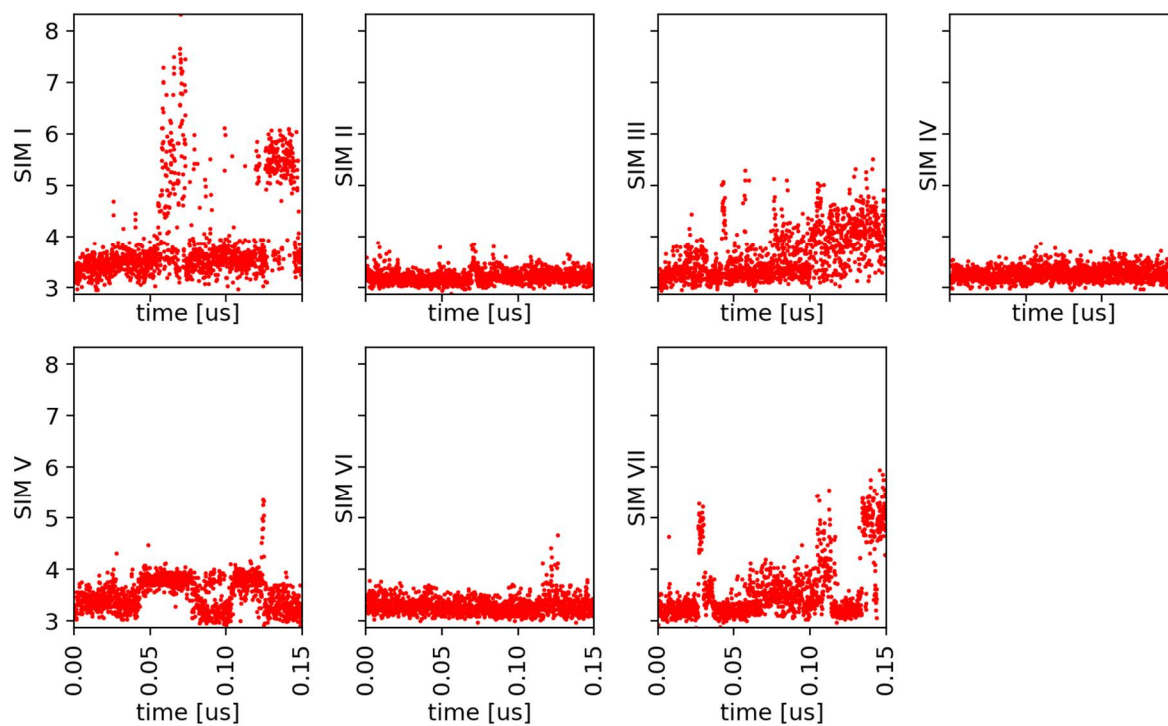

**Figure S5.** Distance between Tyr<sup>1</sup> amine nitrogen in AA3266 and Asp147 (CG) in MD simulations of AA3266/MOR complex.

*Distance is given in Angstroms.*

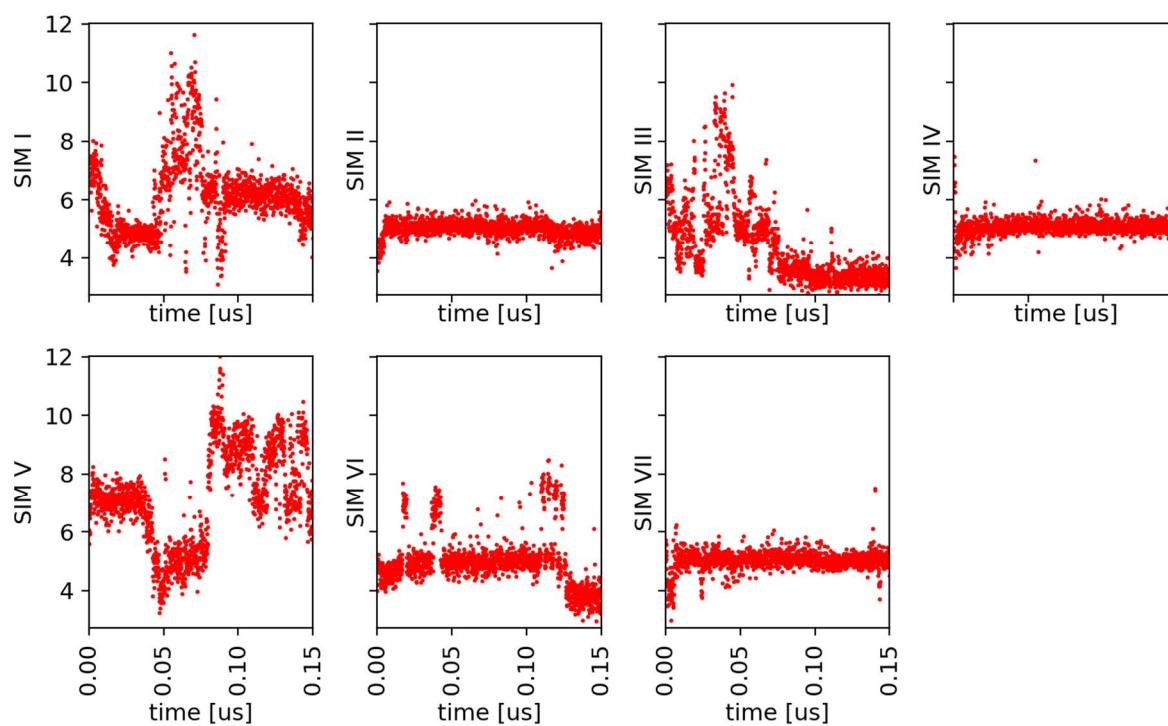

**Figure S6.** Distance between Tyr<sup>1</sup> phenol oxygen in AA3266 and His297 (NE) in MD simulations of AA3266/MOR complex.

*Distance is given in Angstroms.*

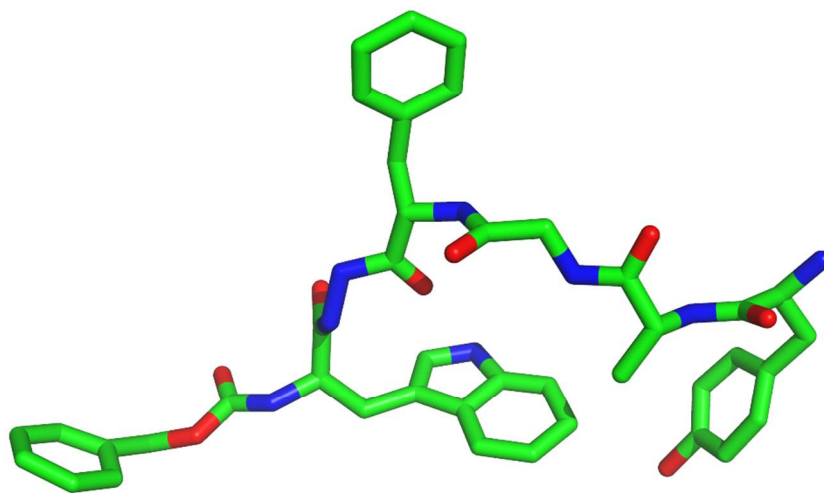

**Figure S7.** Conformation of AA3266 in **MOR-b** binding pose.

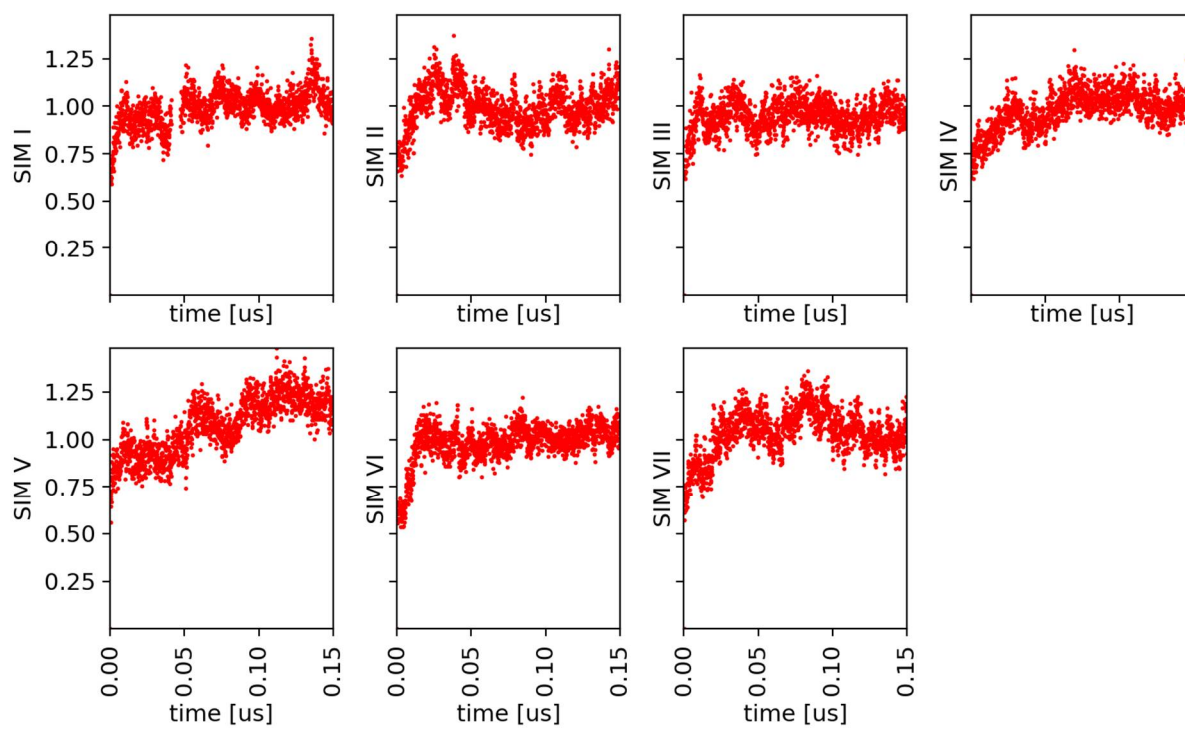

**Figure S8.** RMSD plot of the protein in the simulations of AA3266/NK1R complexes.

*RMSD is given in Angstroms.*

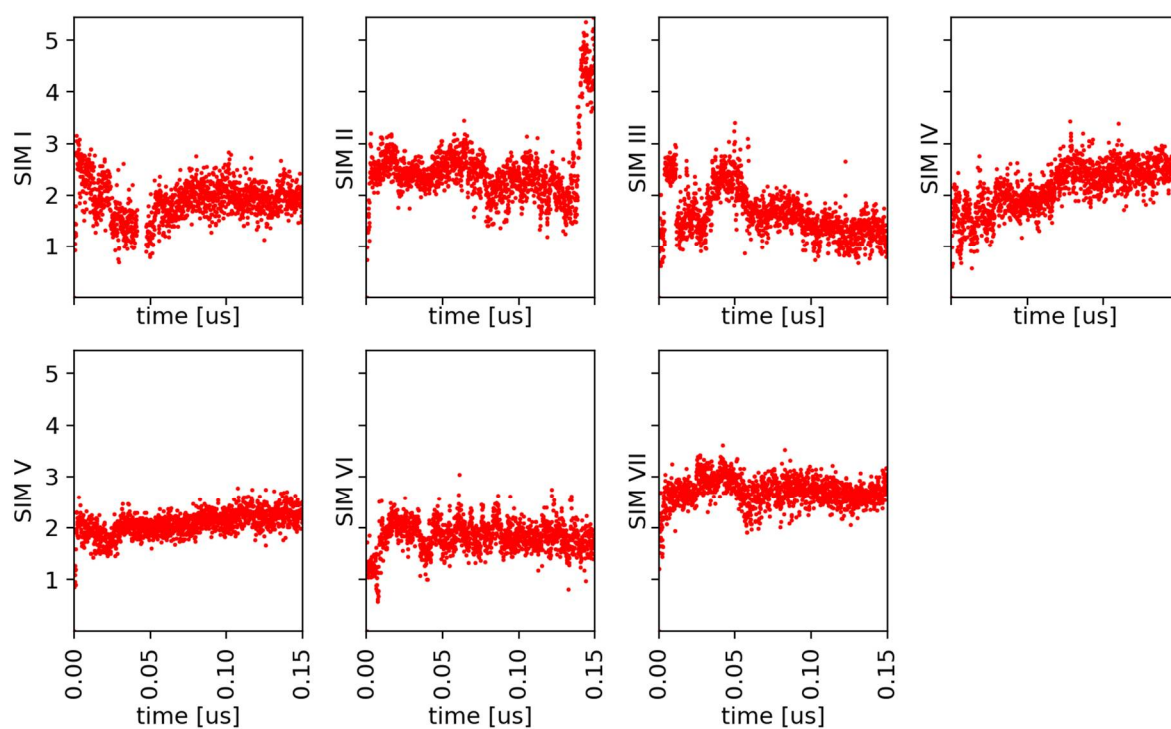

**Figure S9.** RMSD plot of the -NH-NH<-Z-D-Trp fragment in the simulations of AA3266/NK1R complexes.

*RMSD is given in Angstroms.*

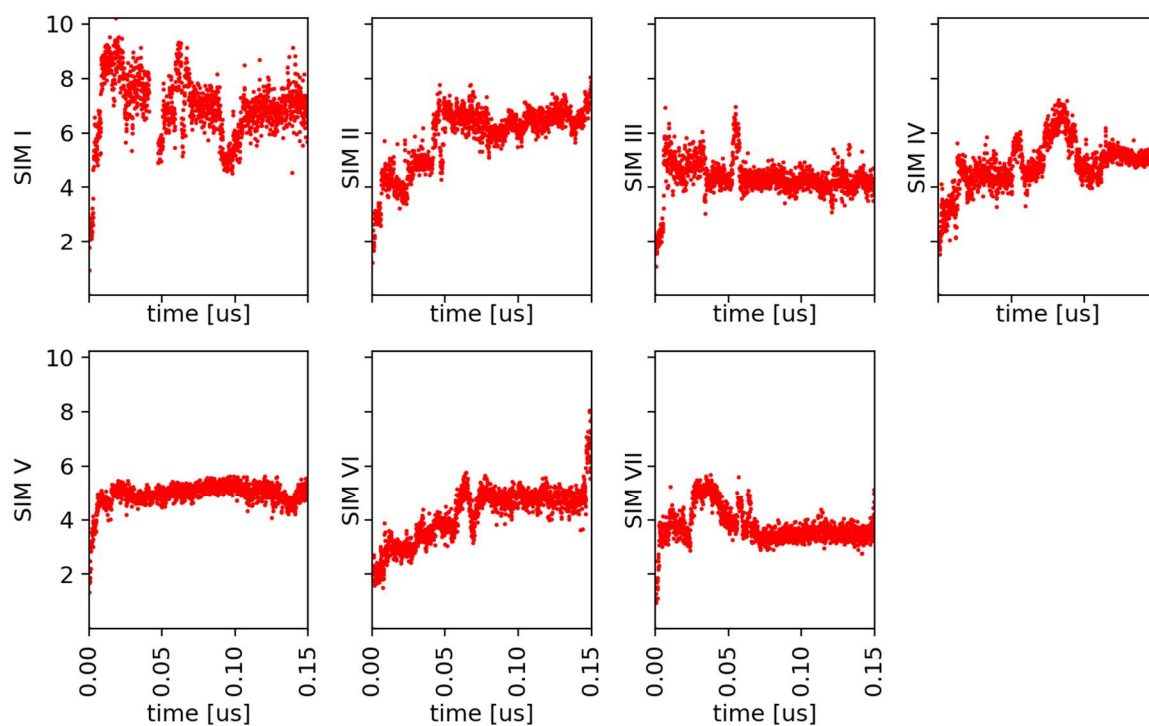

**Figure S10.** RMSD plot of the Tyr-D-Ala-Gly-Phe- fragment in the simulations of AA3266/NK1R complexes.

*RMSD is given in Angstroms.*



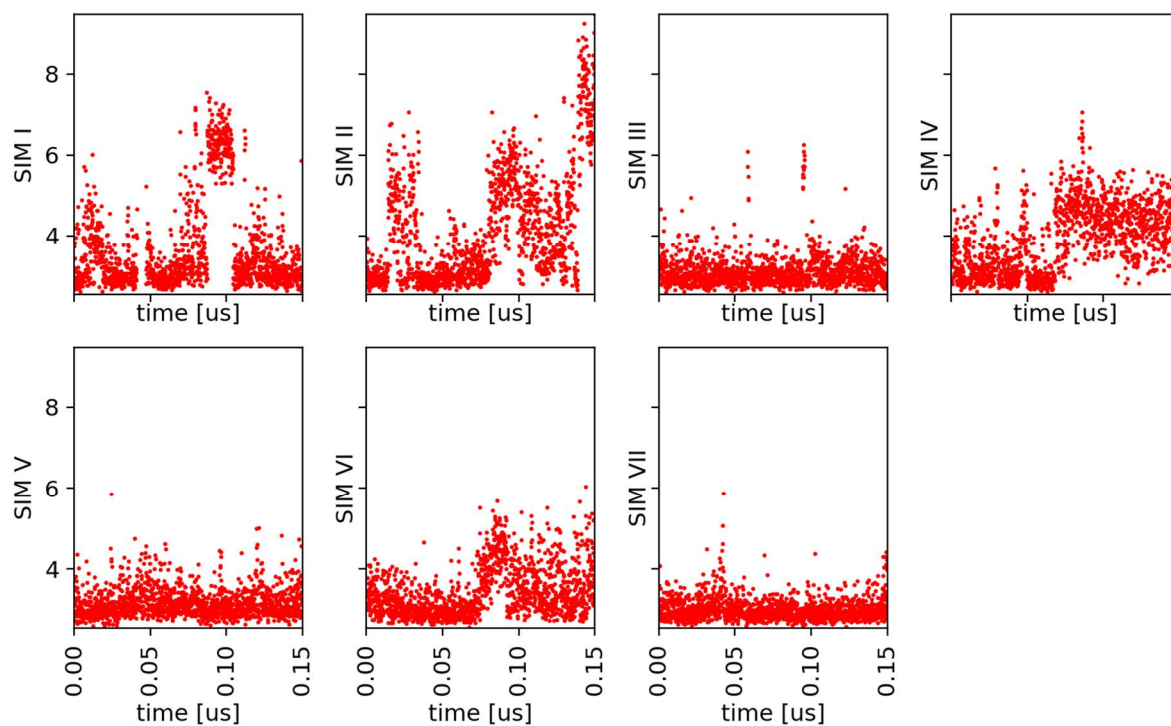

**Figure S11.** Distance between carbamate oxygen in AA3266 and Gln165 (NE) in MD simulations of AA3266/NK1R complex.

*Distance is given in Angstroms.*

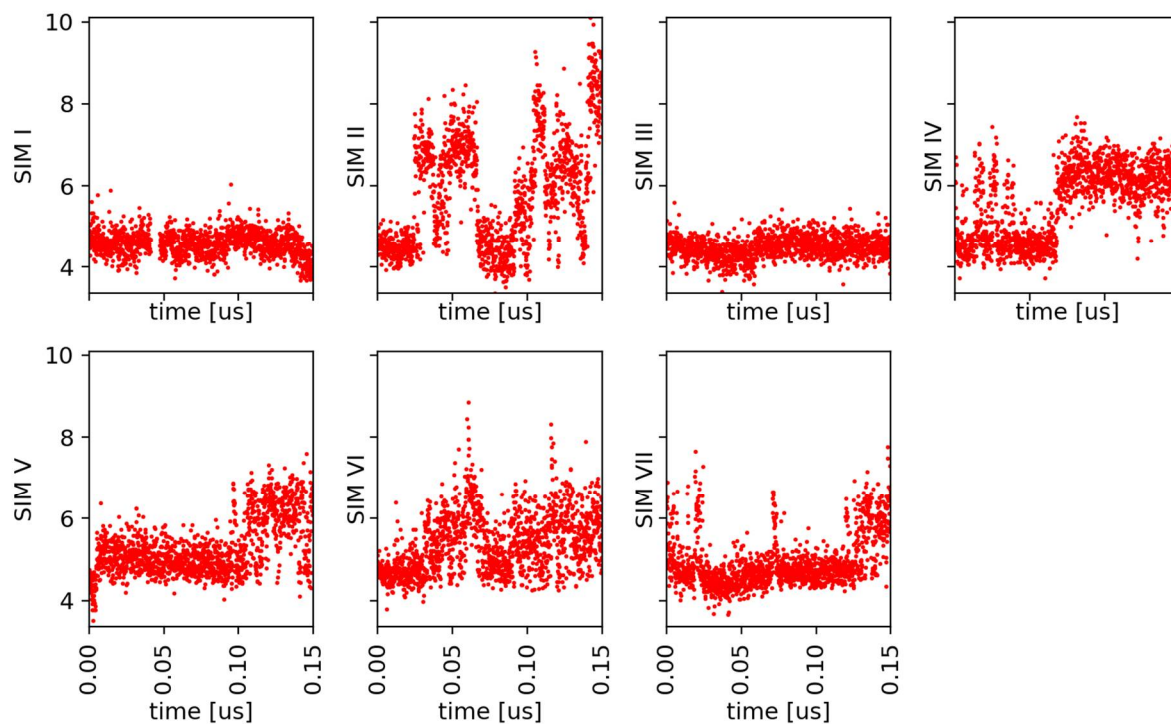

**Figure S12.** Distance between acyl oxygen (of the opioid side) of the *N'*-acylhydrazide in AA3266 and Asn109 (ND) in MD simulations of AA3266/NK1R complex.

*Distance is given in Angstroms.*

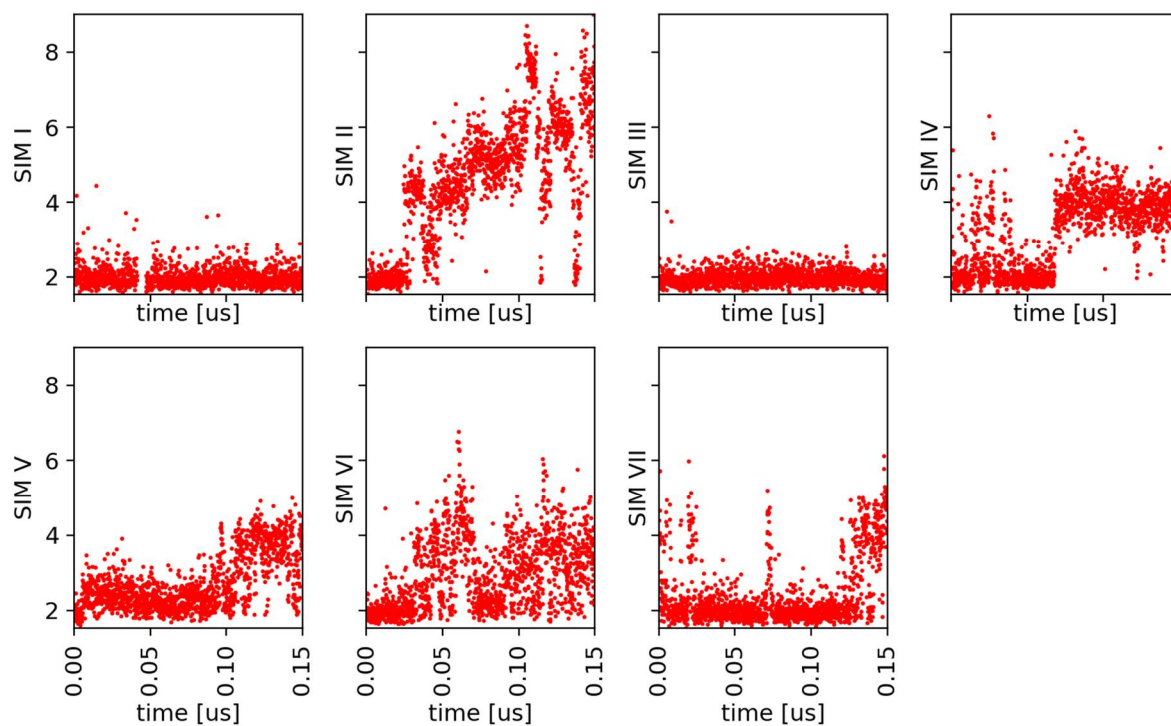

**Figure S13.** Distance between hydrogen (of the D-Trp side) of the *N'*-acylhydrazide in AA3266 and Asn109 (OD) in MD simulations of AA3266/NK1R complex.

*Distance is given in Angstroms.*

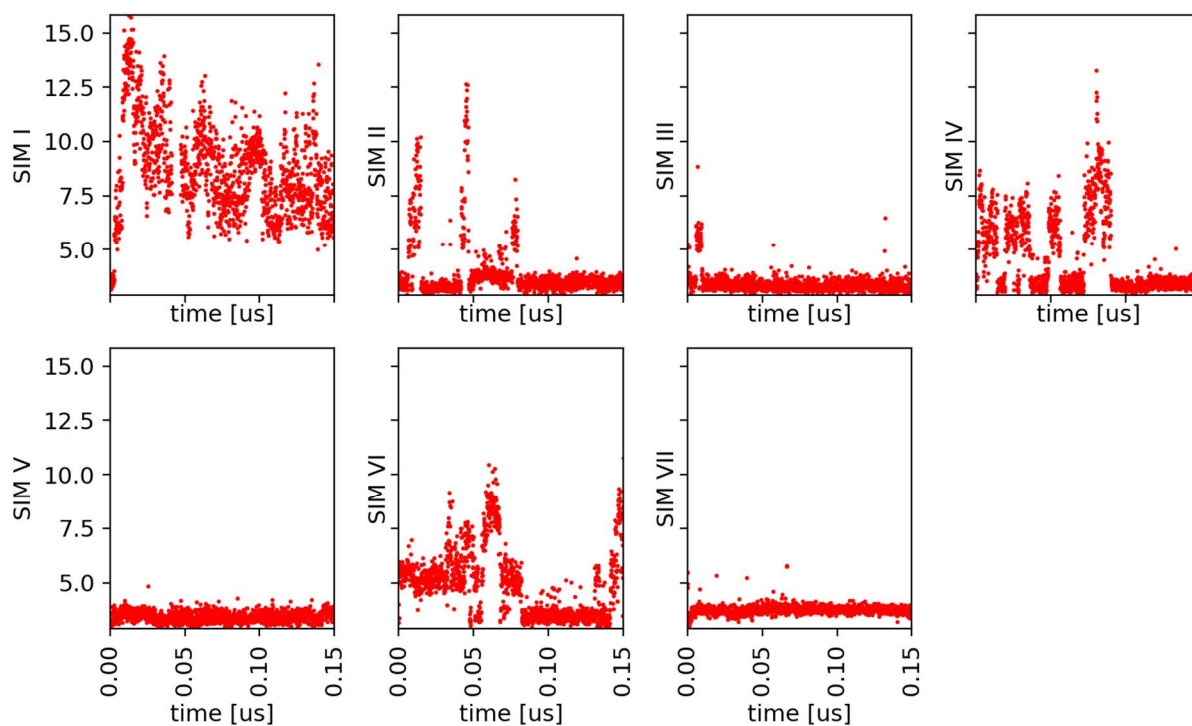

**Figure S14.** Distance between Tyr1 amine in AA3266 and Glu193 (CD) in MD simulations of AA3266/NK1R complex.

*Distance is given in Angstroms.*
